# Supplementary material for: Investigating the Impact of Environment and Data Aggregation by Walking Bout Duration on Parkinson’s Disease Classification Using Machine Learning
Source: Frontiers journal article supplement (doi:10.3389/fnagi.2022.808518), 2022-03-22
Supplement: Data_Sheet_1.PDF [file Data_Sheet_1.PDF]

## Supplementary Material

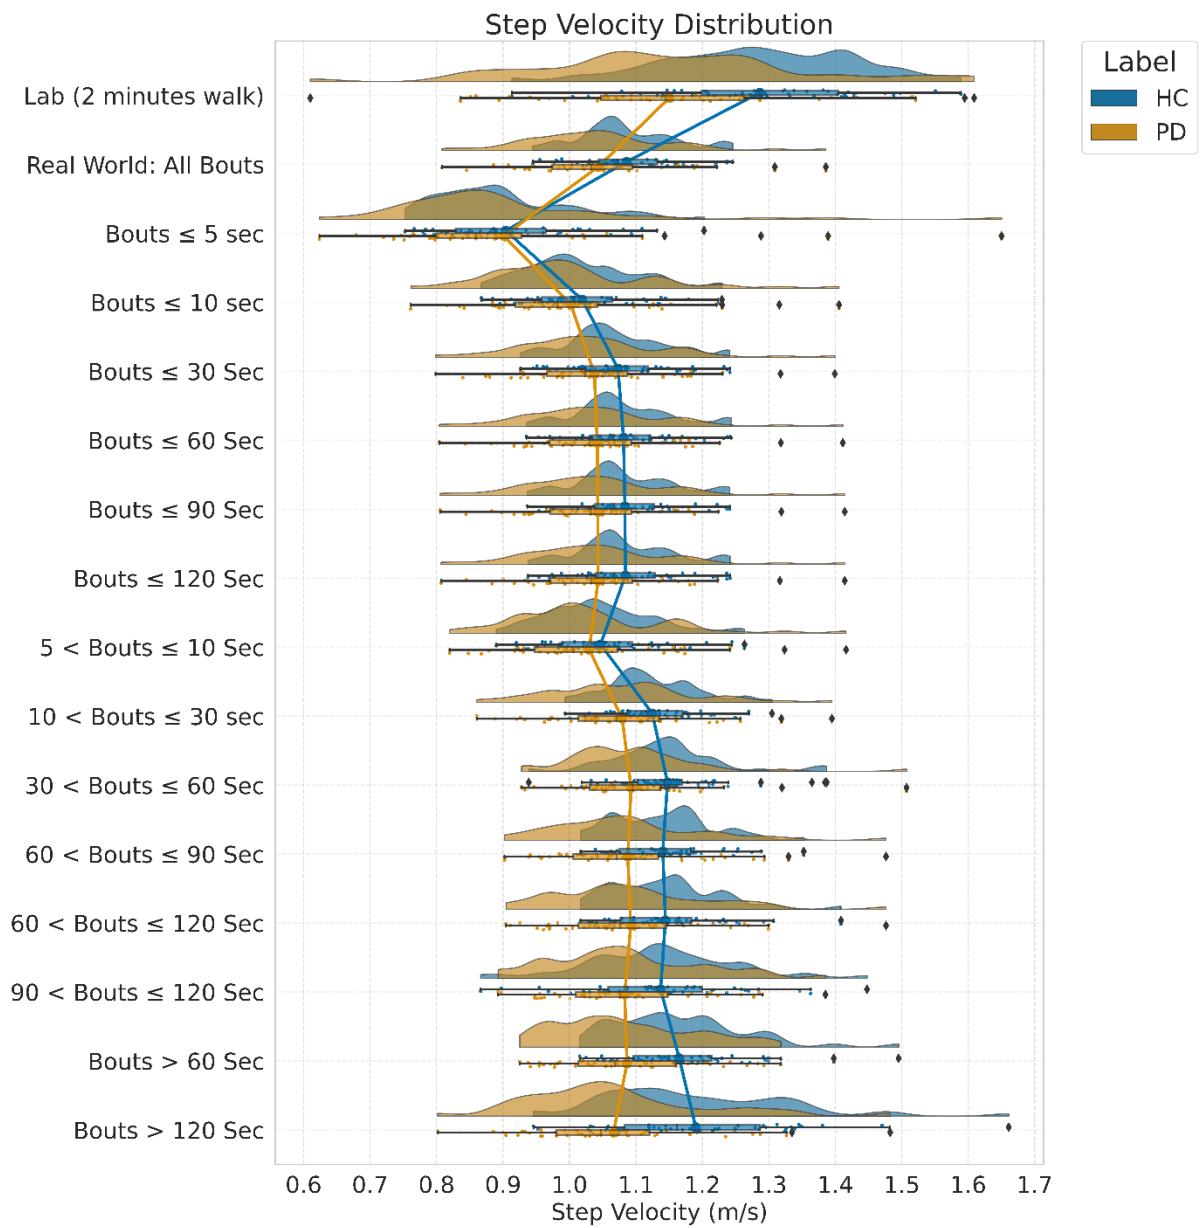

**Supplementary Figure 1.** Distribution of step velocity (m/s) into different WB thresholds followed by average of 7 days

(A)

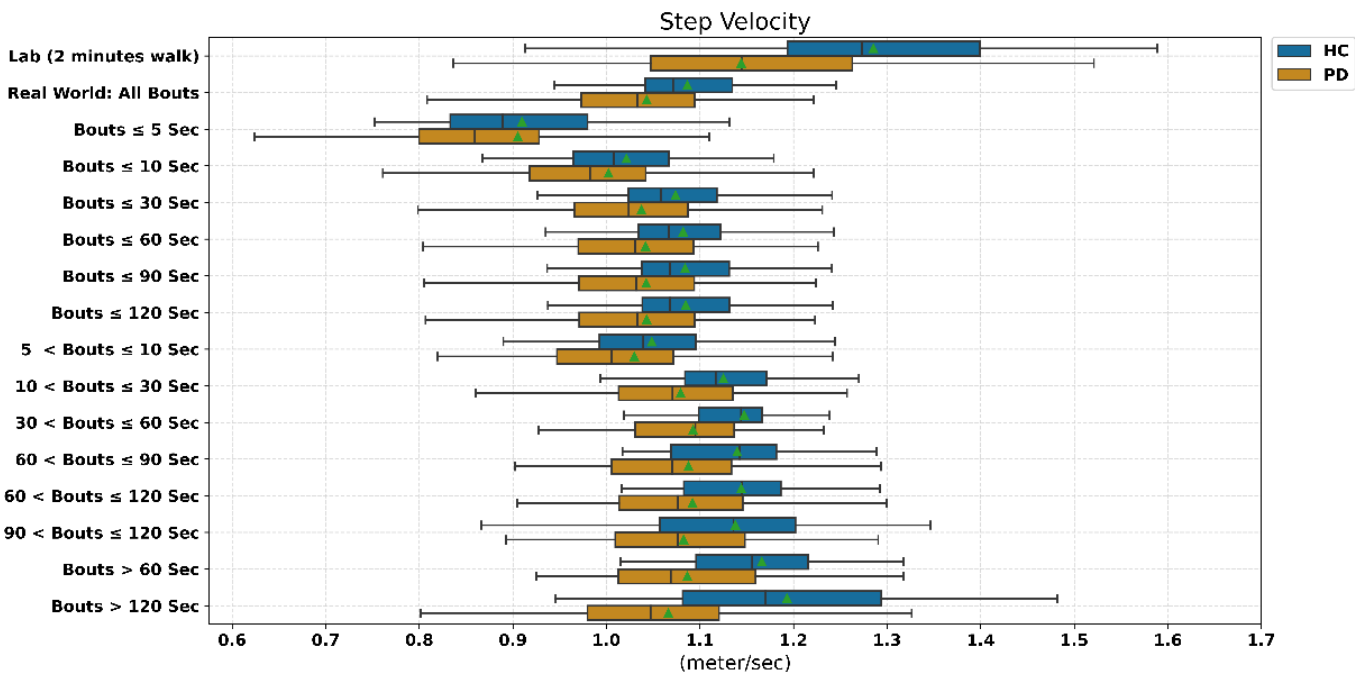

(B)

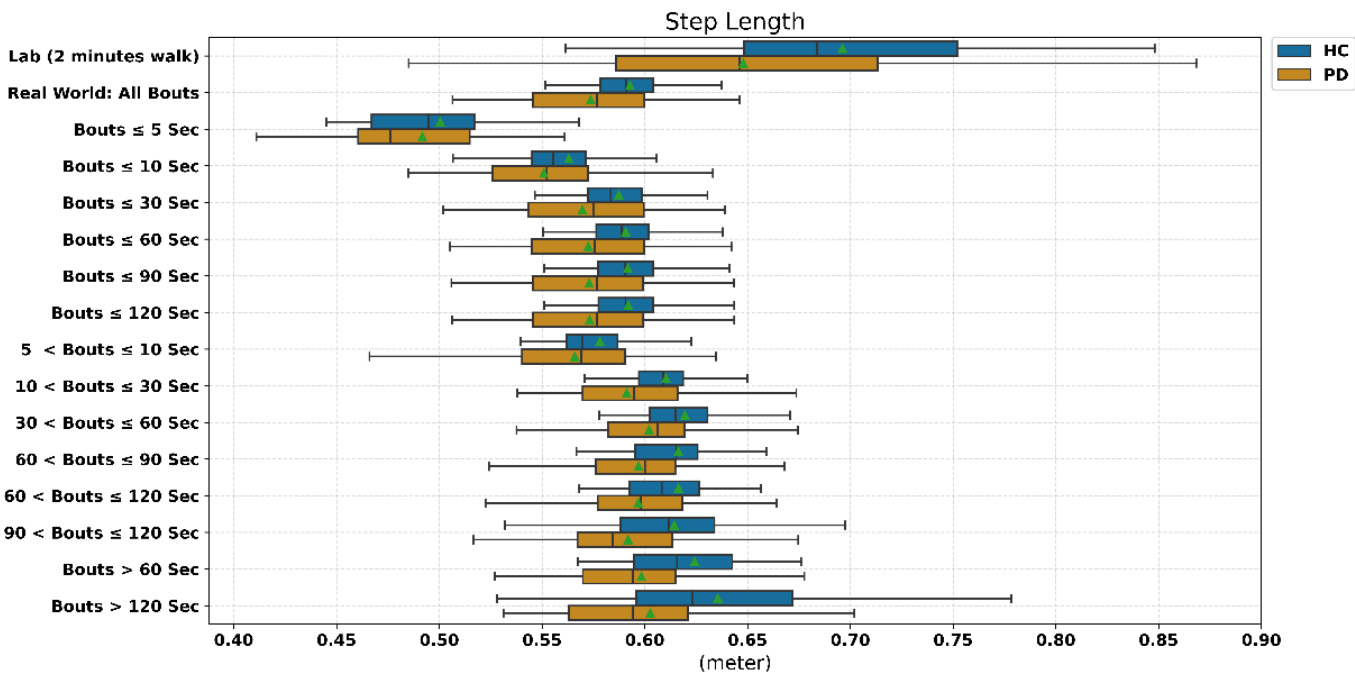

(C)

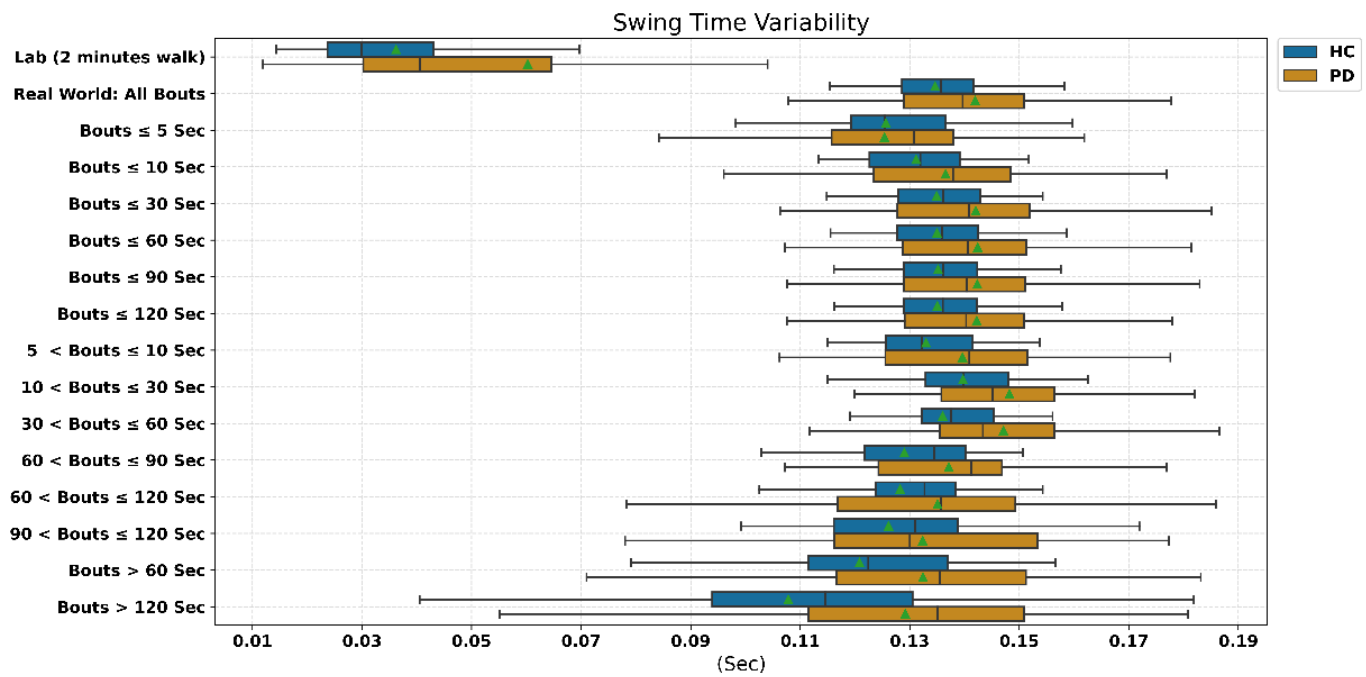

(D)

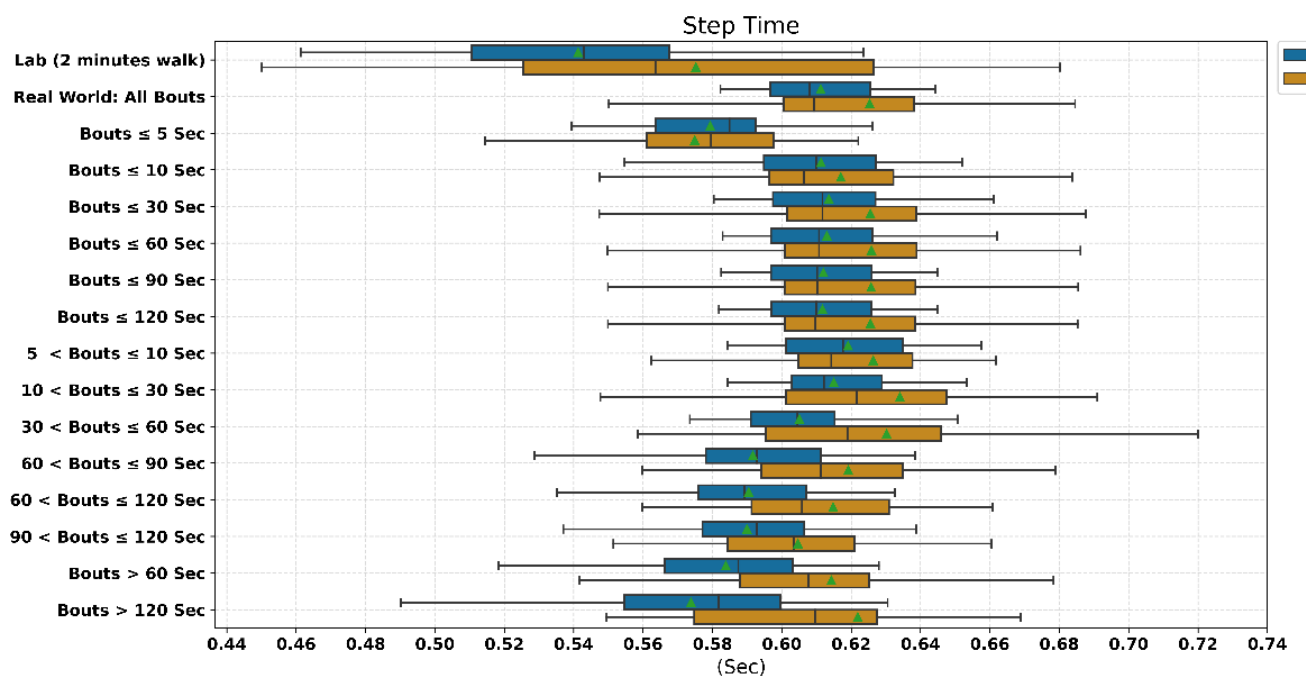

(E)

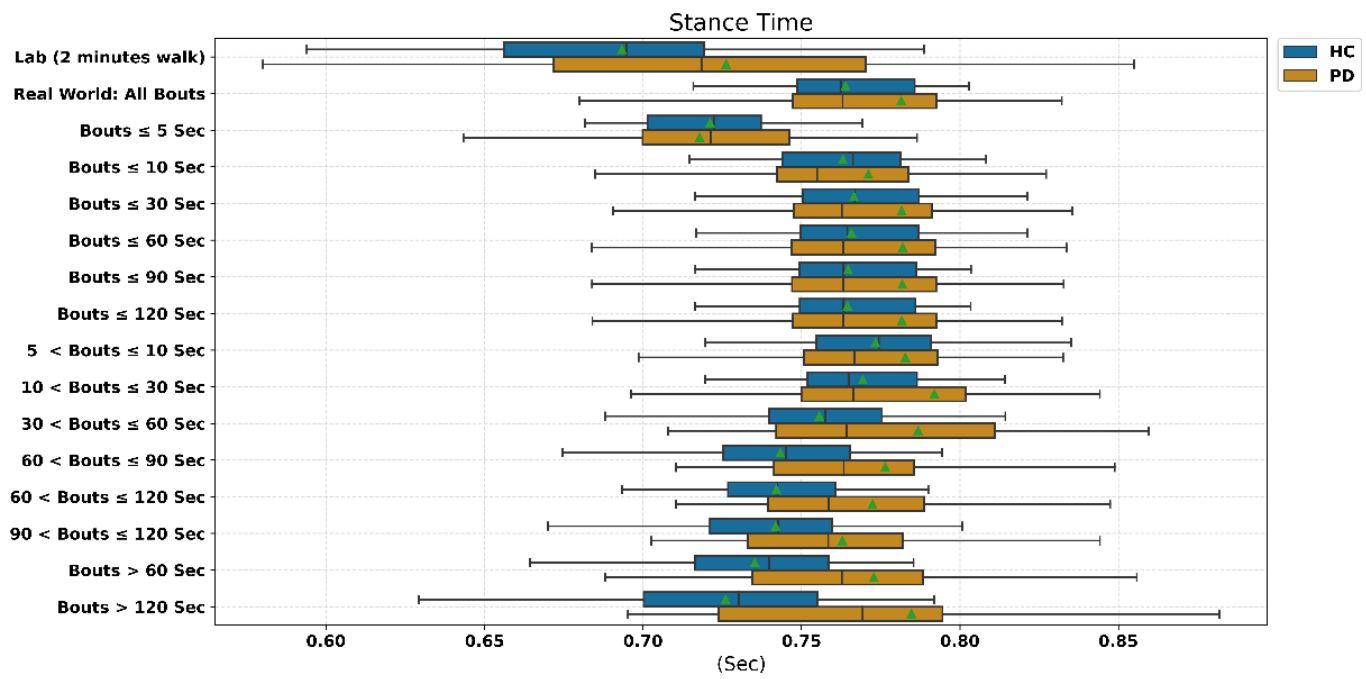

(F)

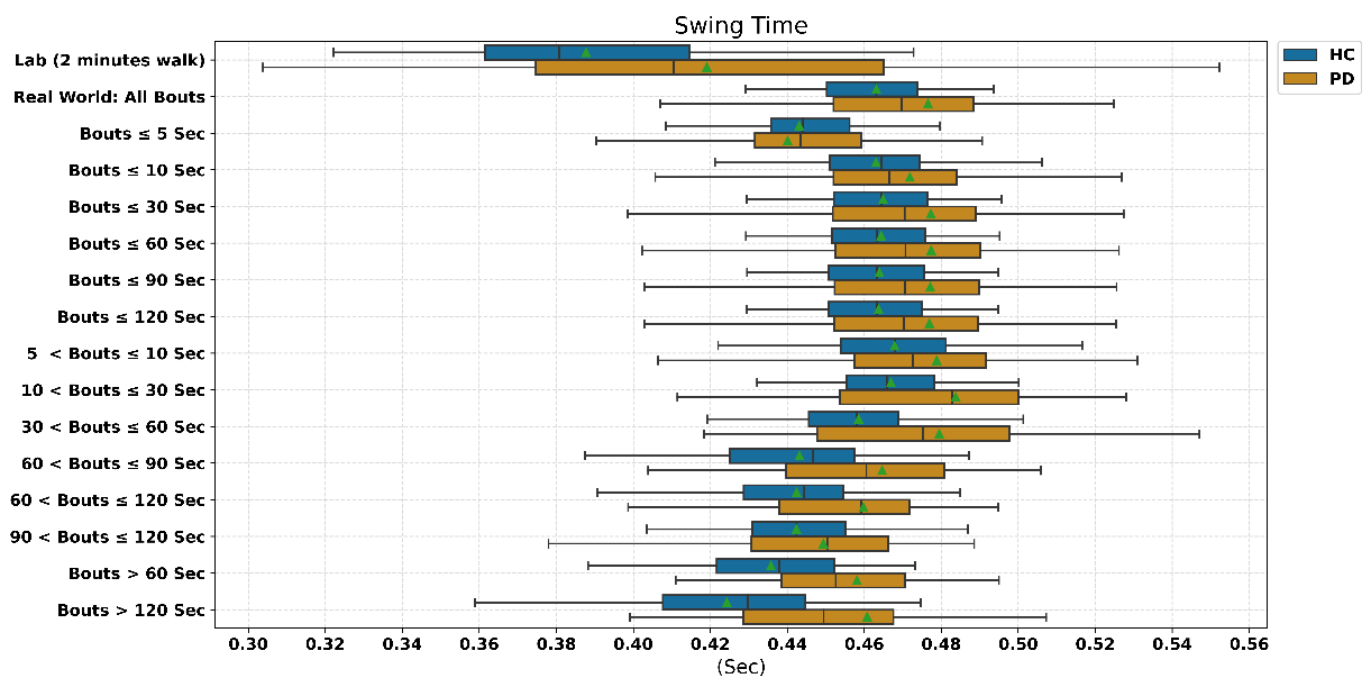

(G)

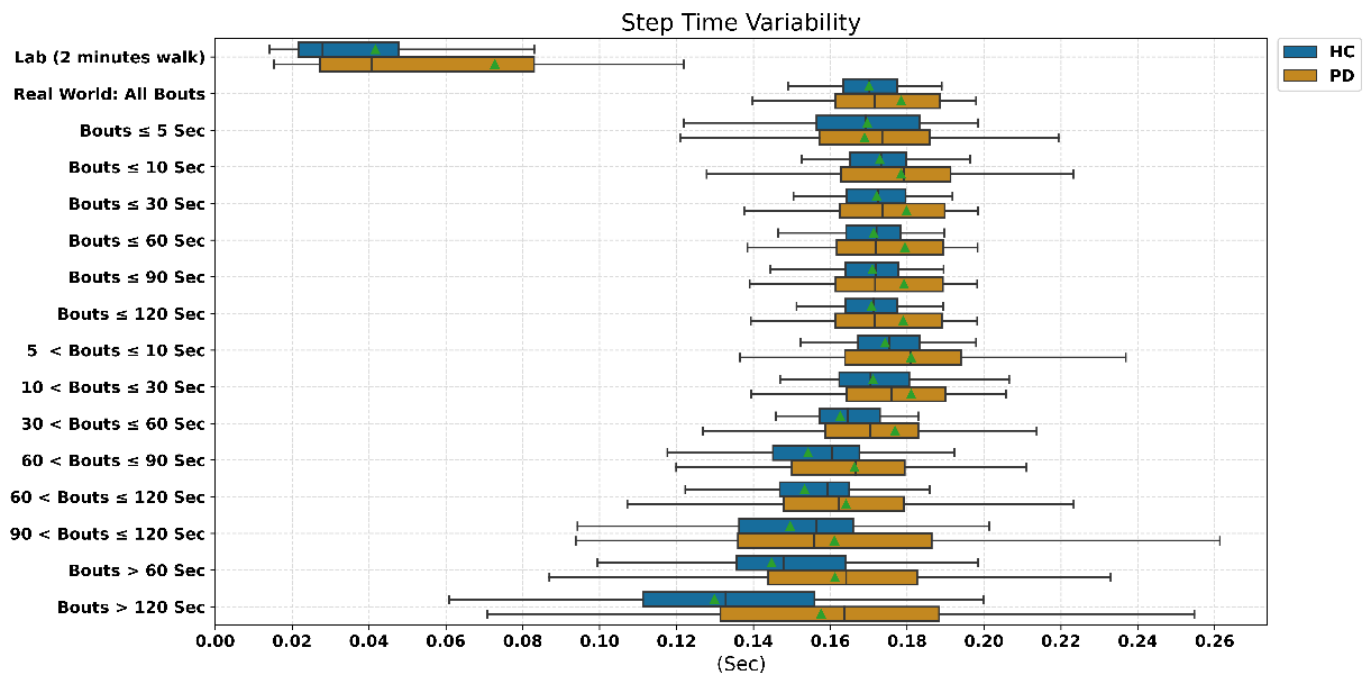

(H)

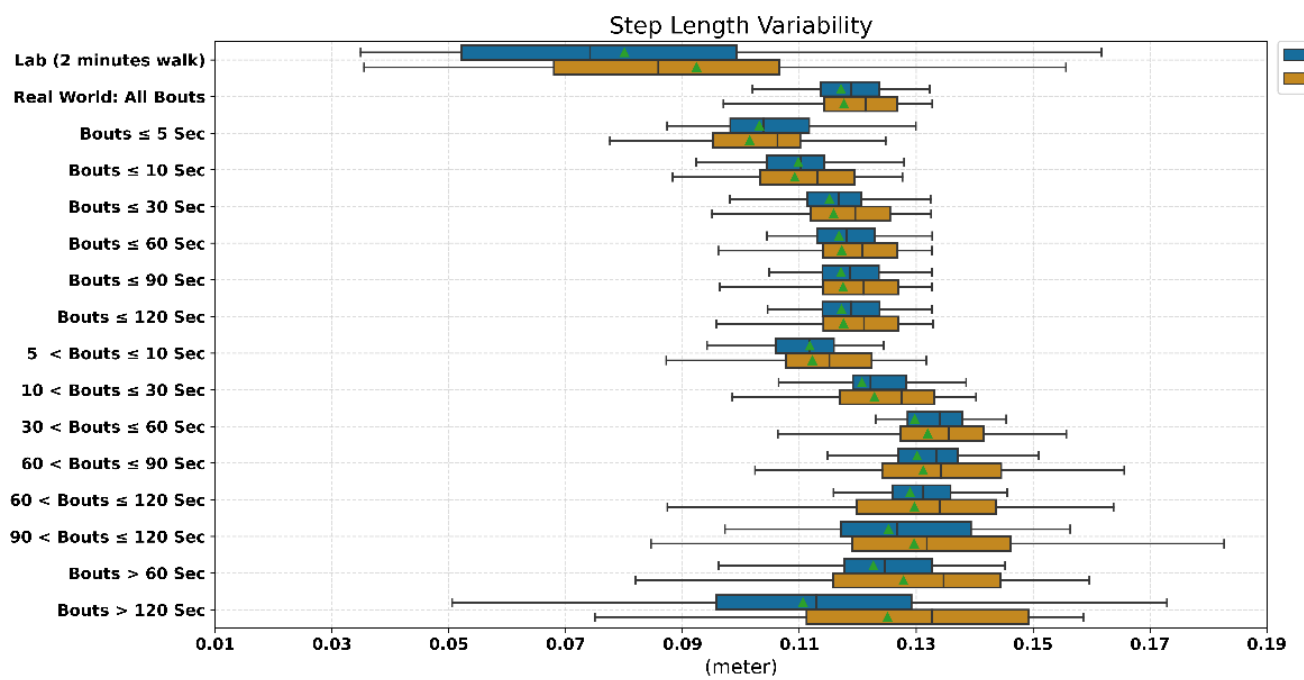

(I)

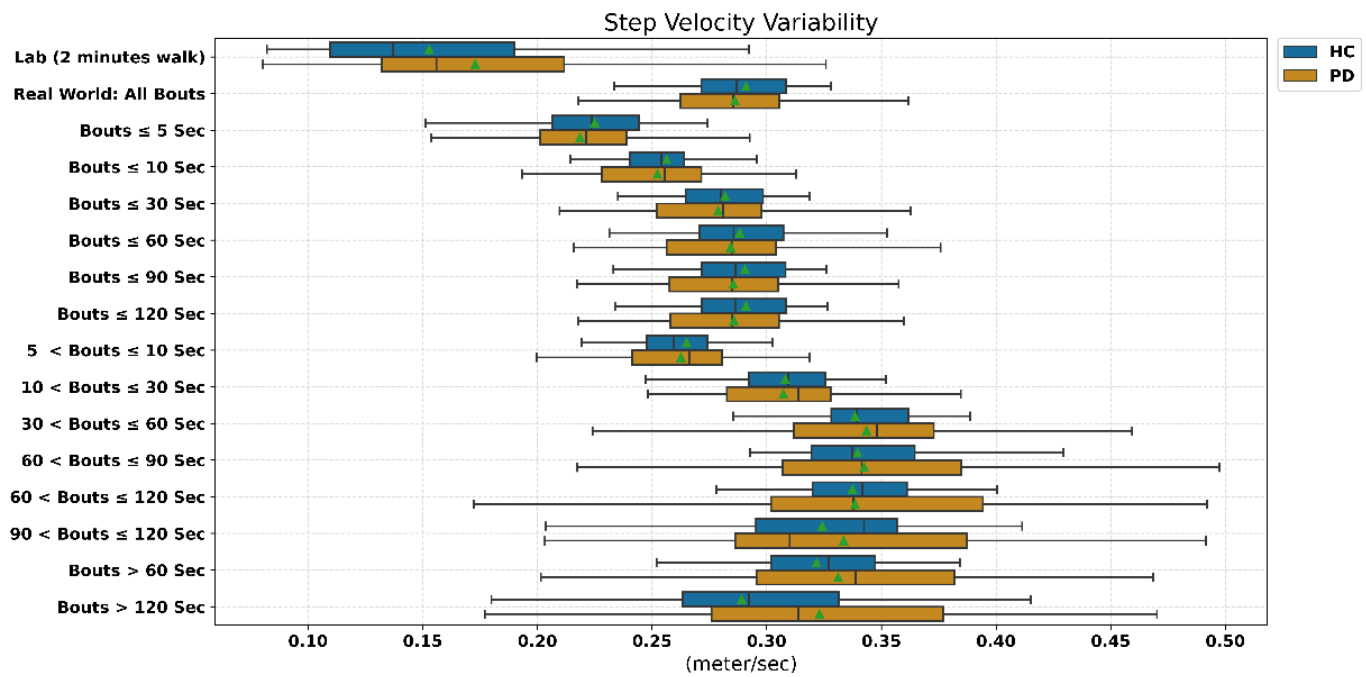

(J)

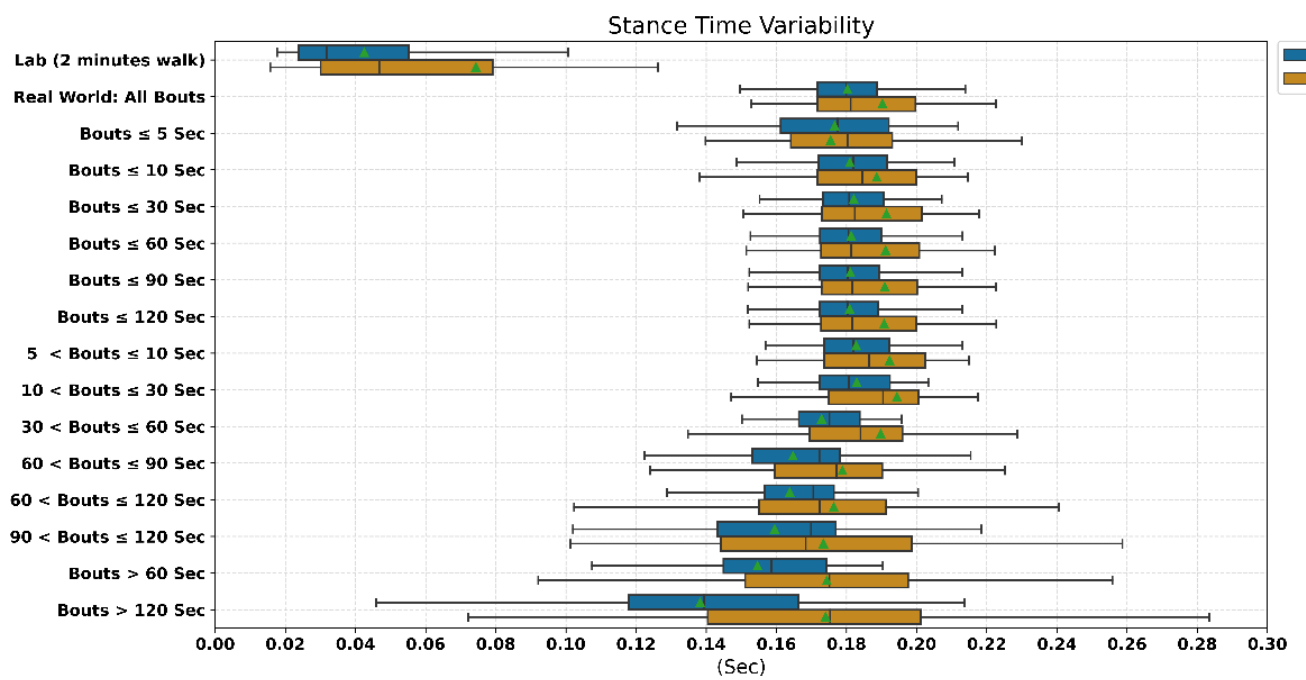

(K)

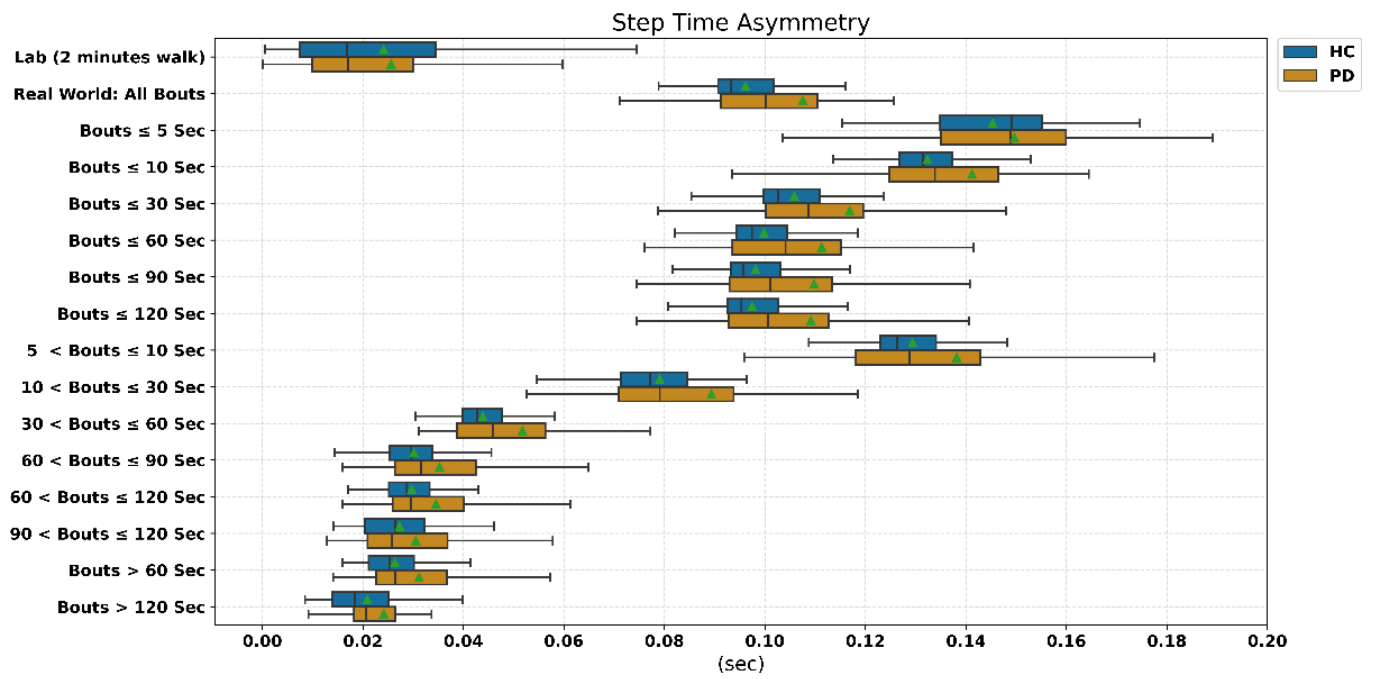

(L)

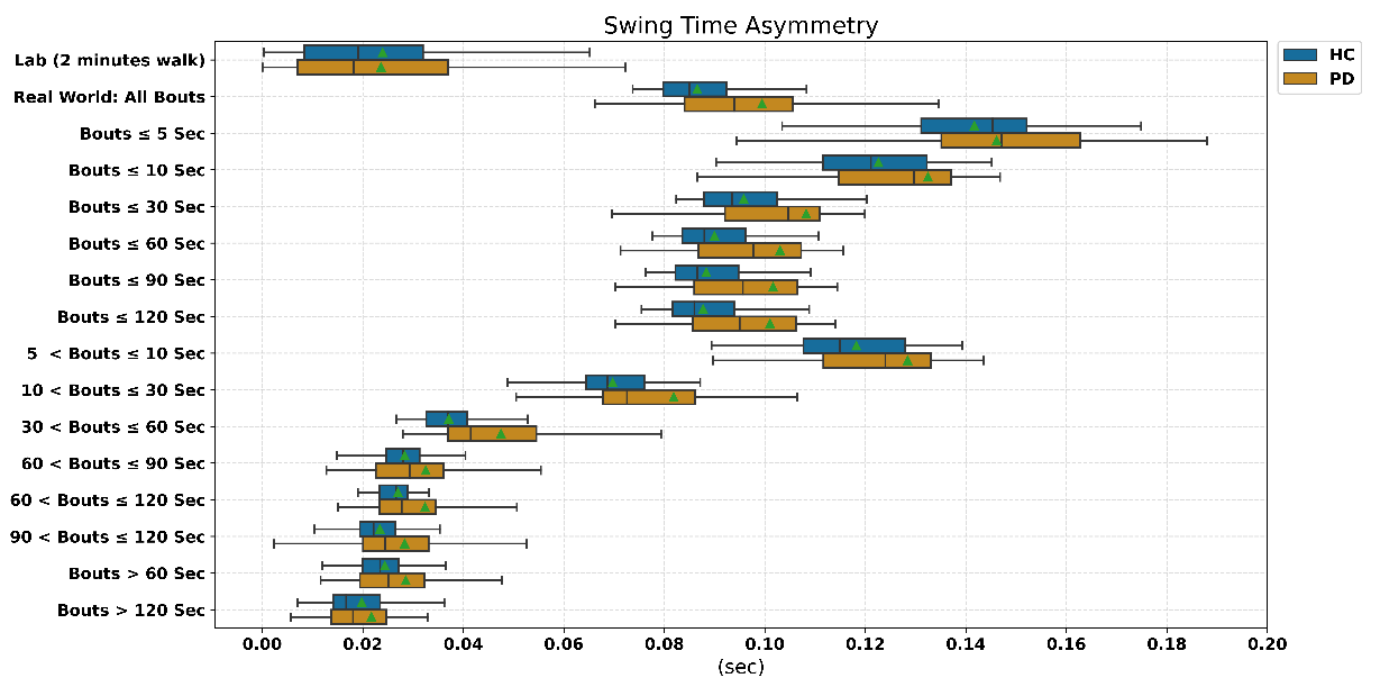

(M)

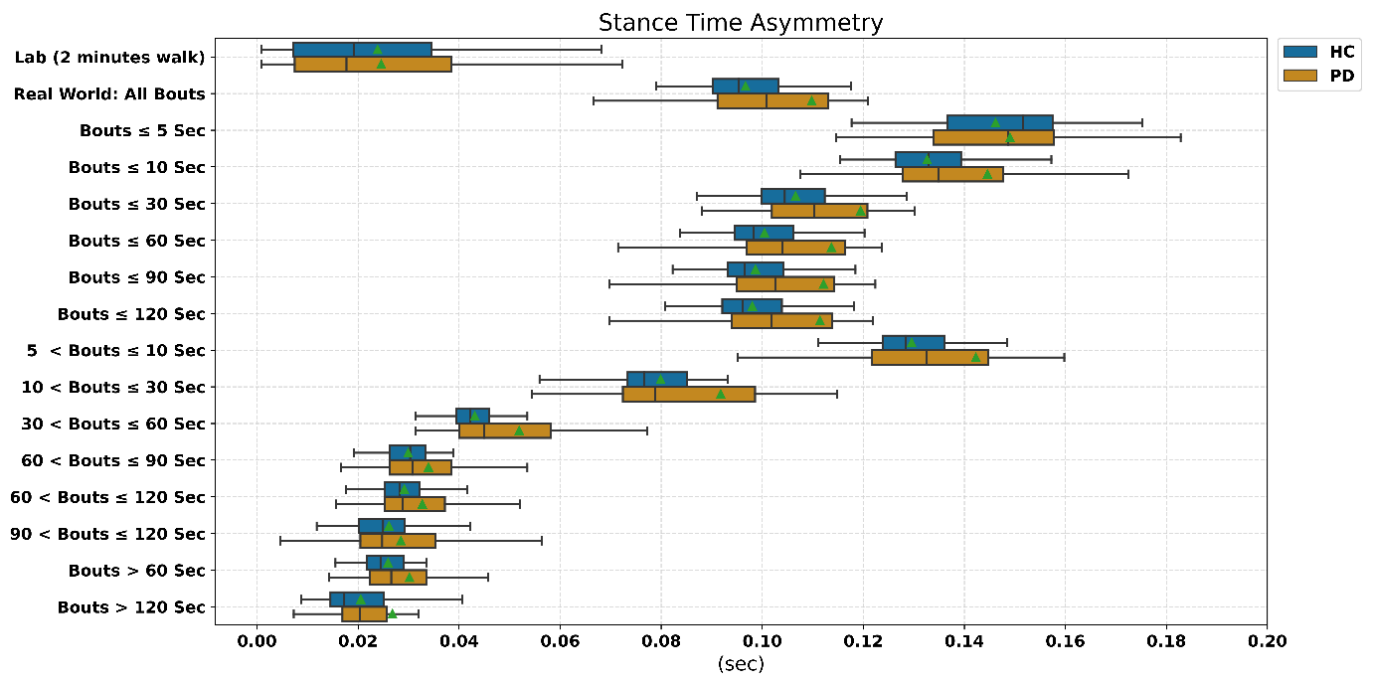

(N)

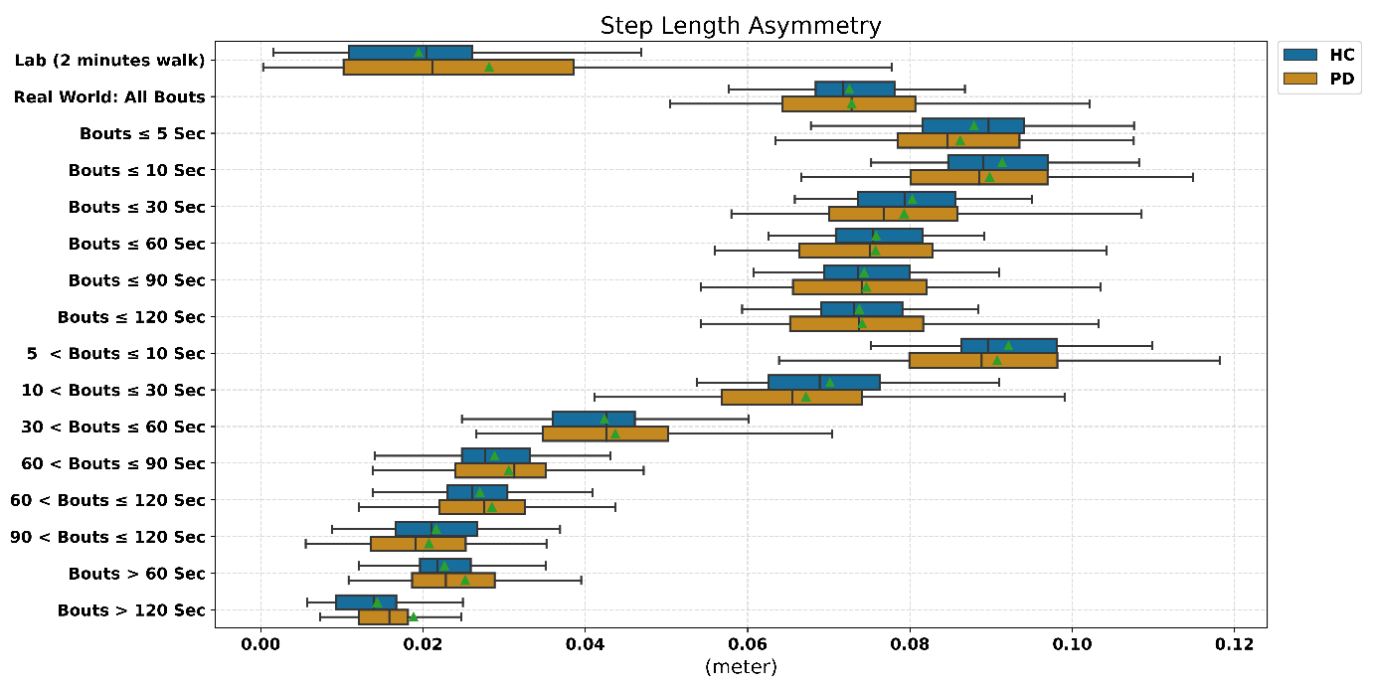

**Supplementary Figure 2.** Boxplots of 14 gait characteristics (A-N) under different thresholds



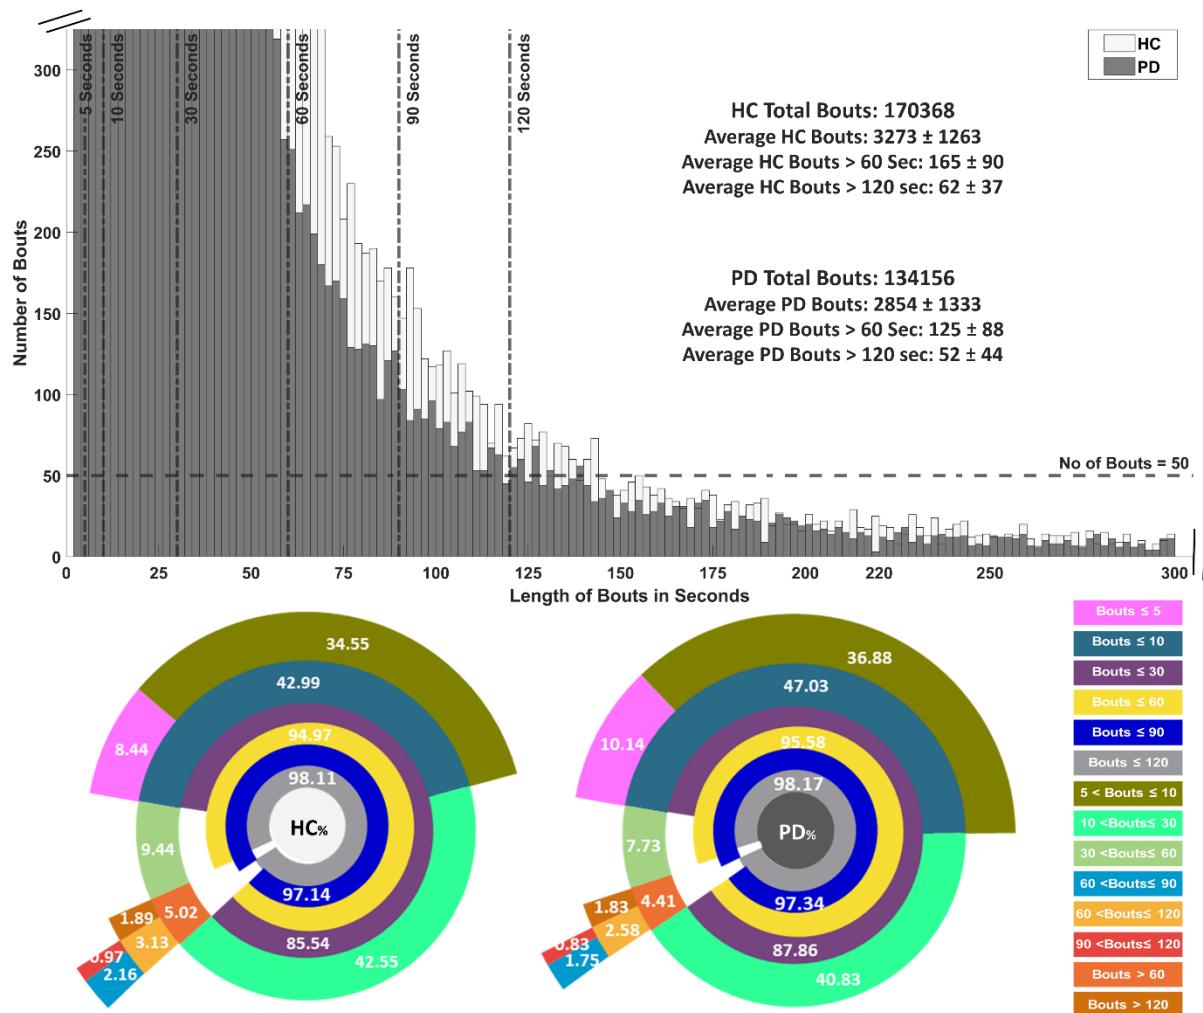

**Supplementary Figure 3.** Distribution of the all detected WB in PD and HC group in the real world assessment of 7 days; WB are categorised into 14 thresholds based on time in seconds followed by their average of 7 days

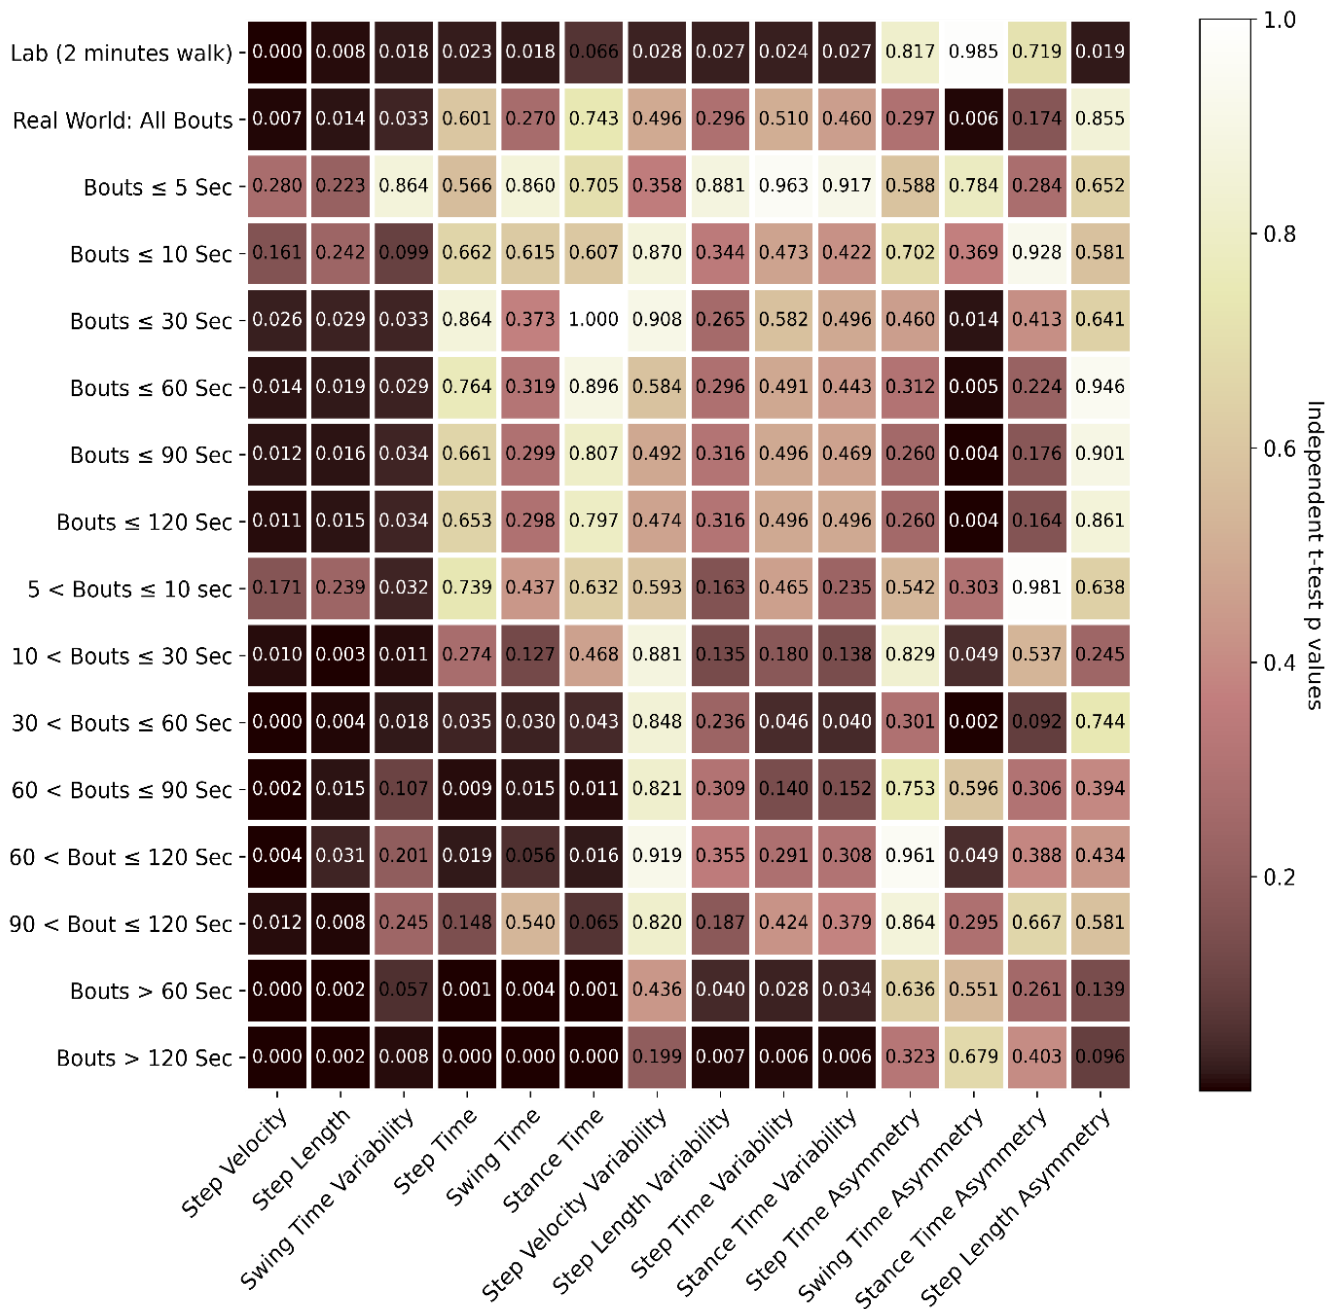

**Supplementary Figure 4.** Comparison of effect of environment (lab vs real-world) and bout duration (threshold) on discrimination between PD and HC participants (Dark highlighted colour means lower p values)

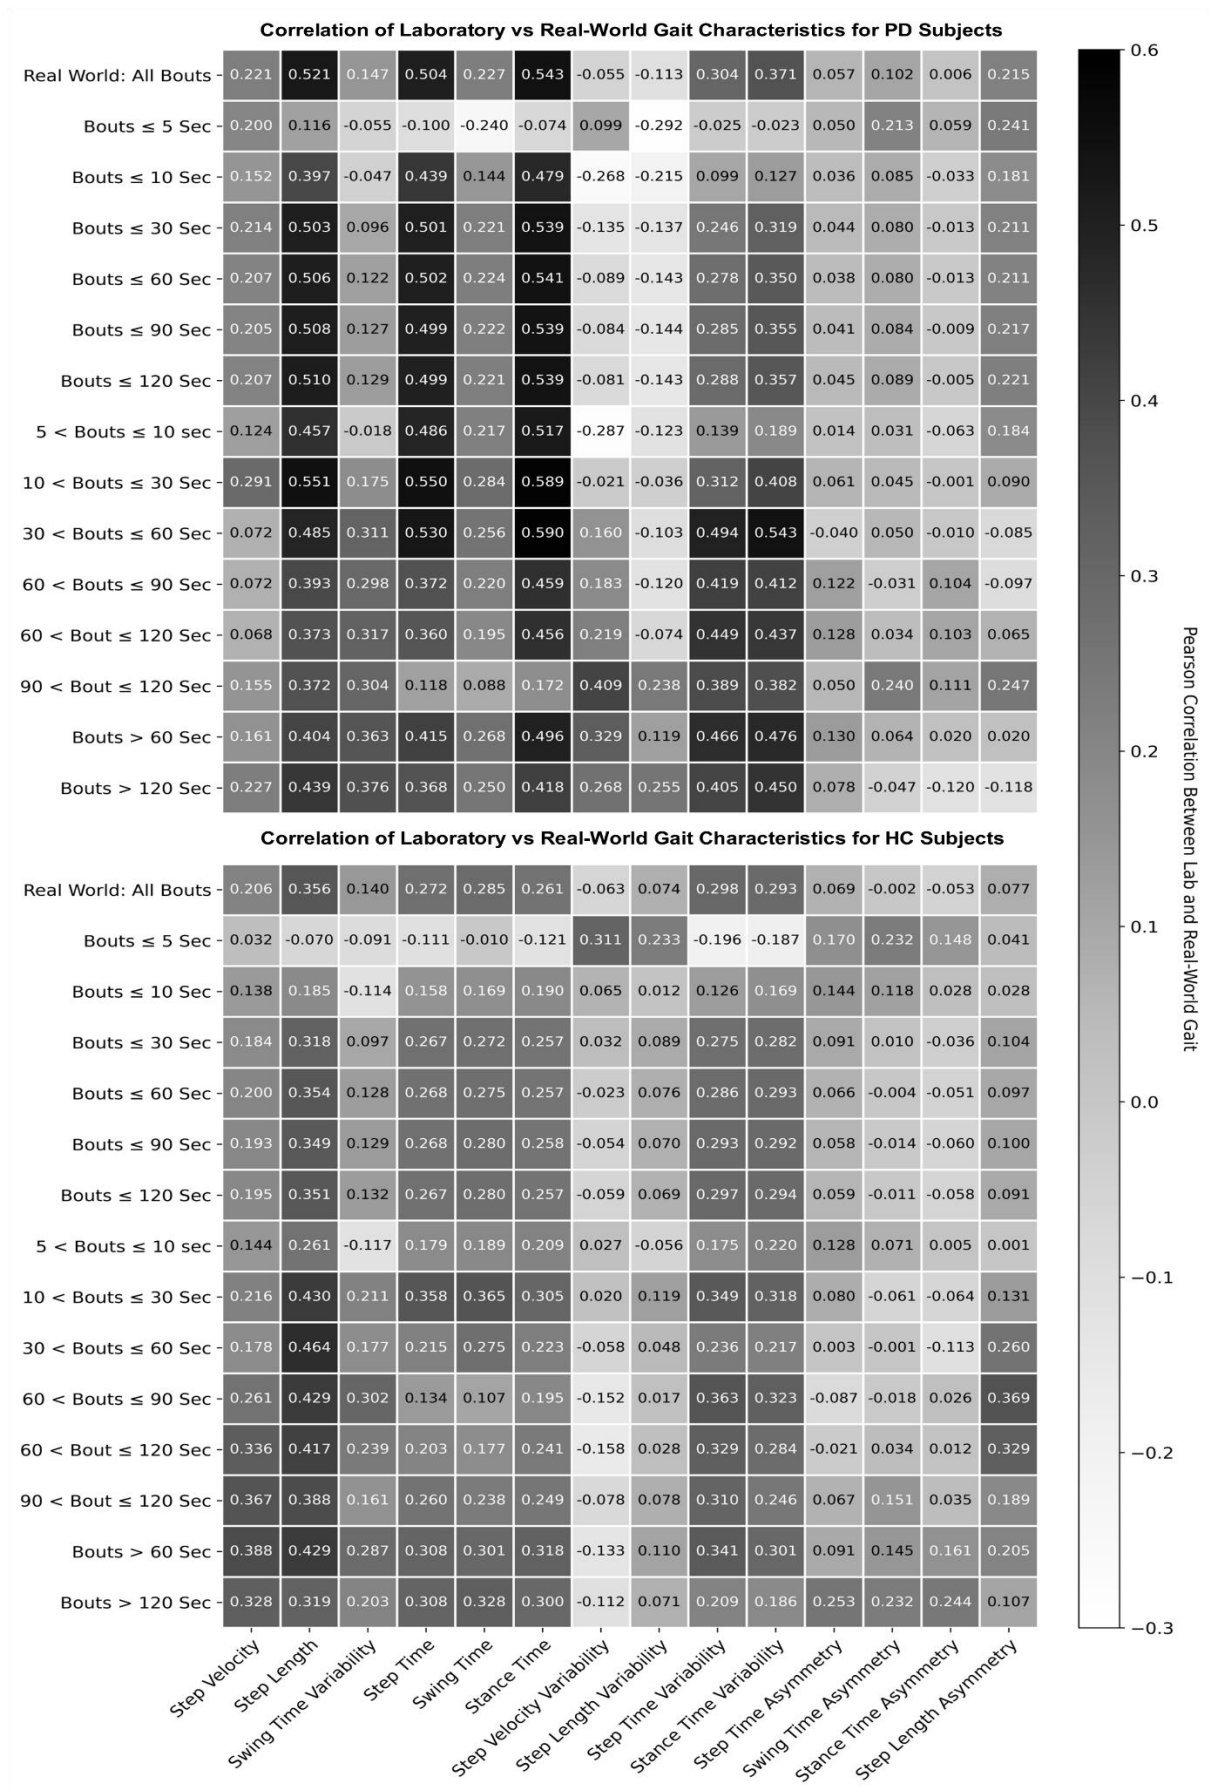

**Supplementary Figure 5.** Correlation of lab-based gait characteristics with real-world gait

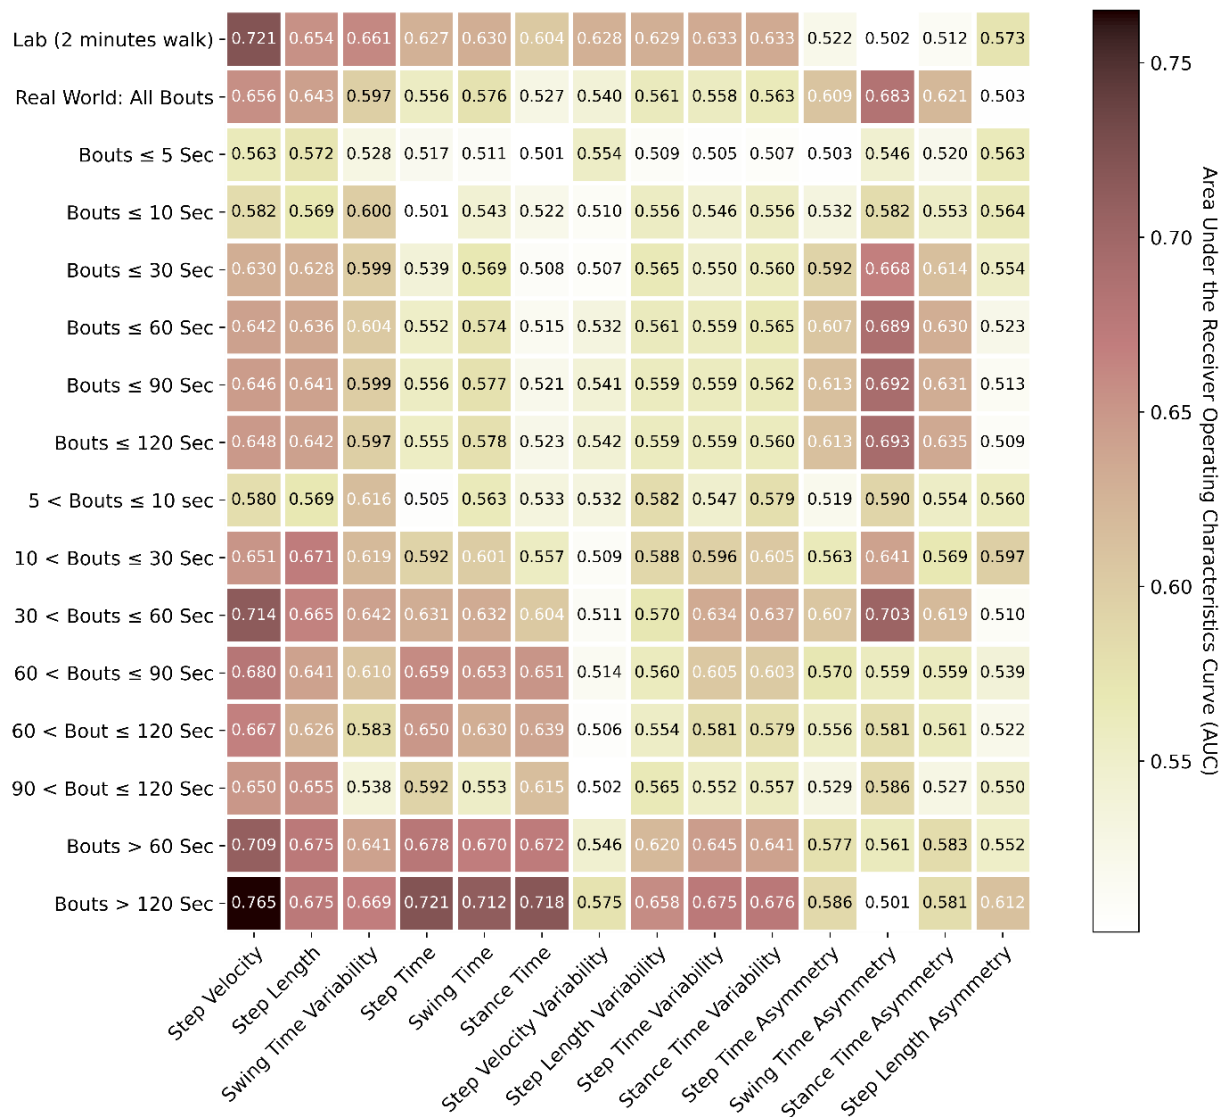

**Supplementary Figure 6.** Discrimination of PD from HC based on each individual gait characteristic with area under the receiver operating characteristics curve (AUC)

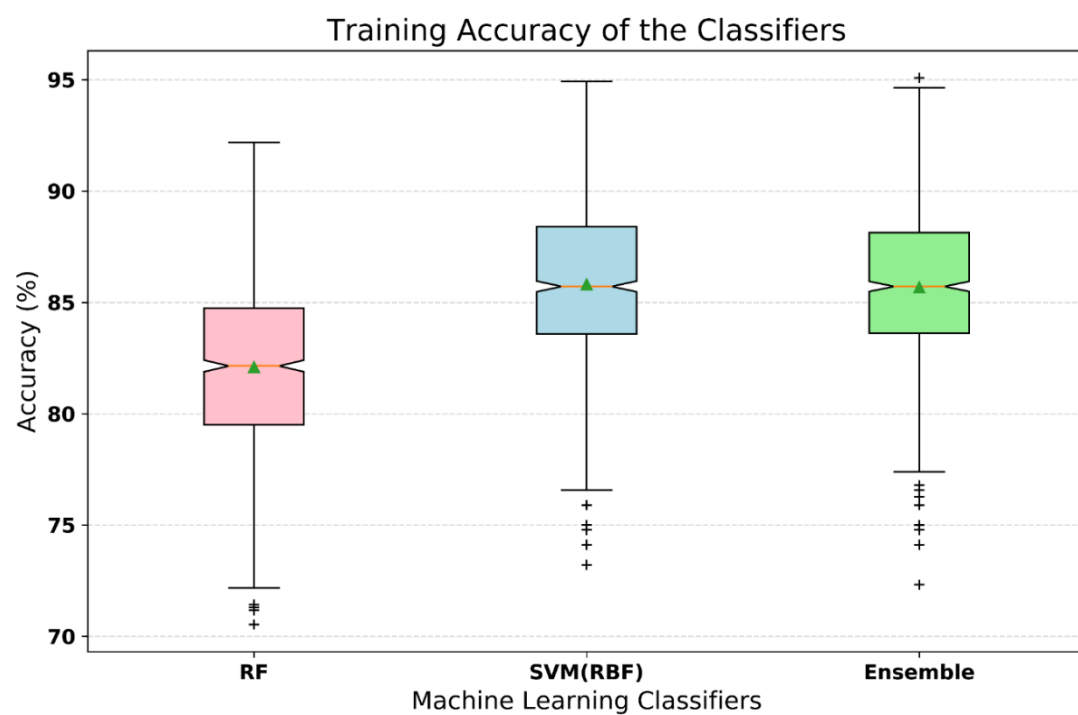

**Supplementary Figure 7.** Training accuracy of the classifiers based on 10-fold cross-validation by combining the distribution of the overall data

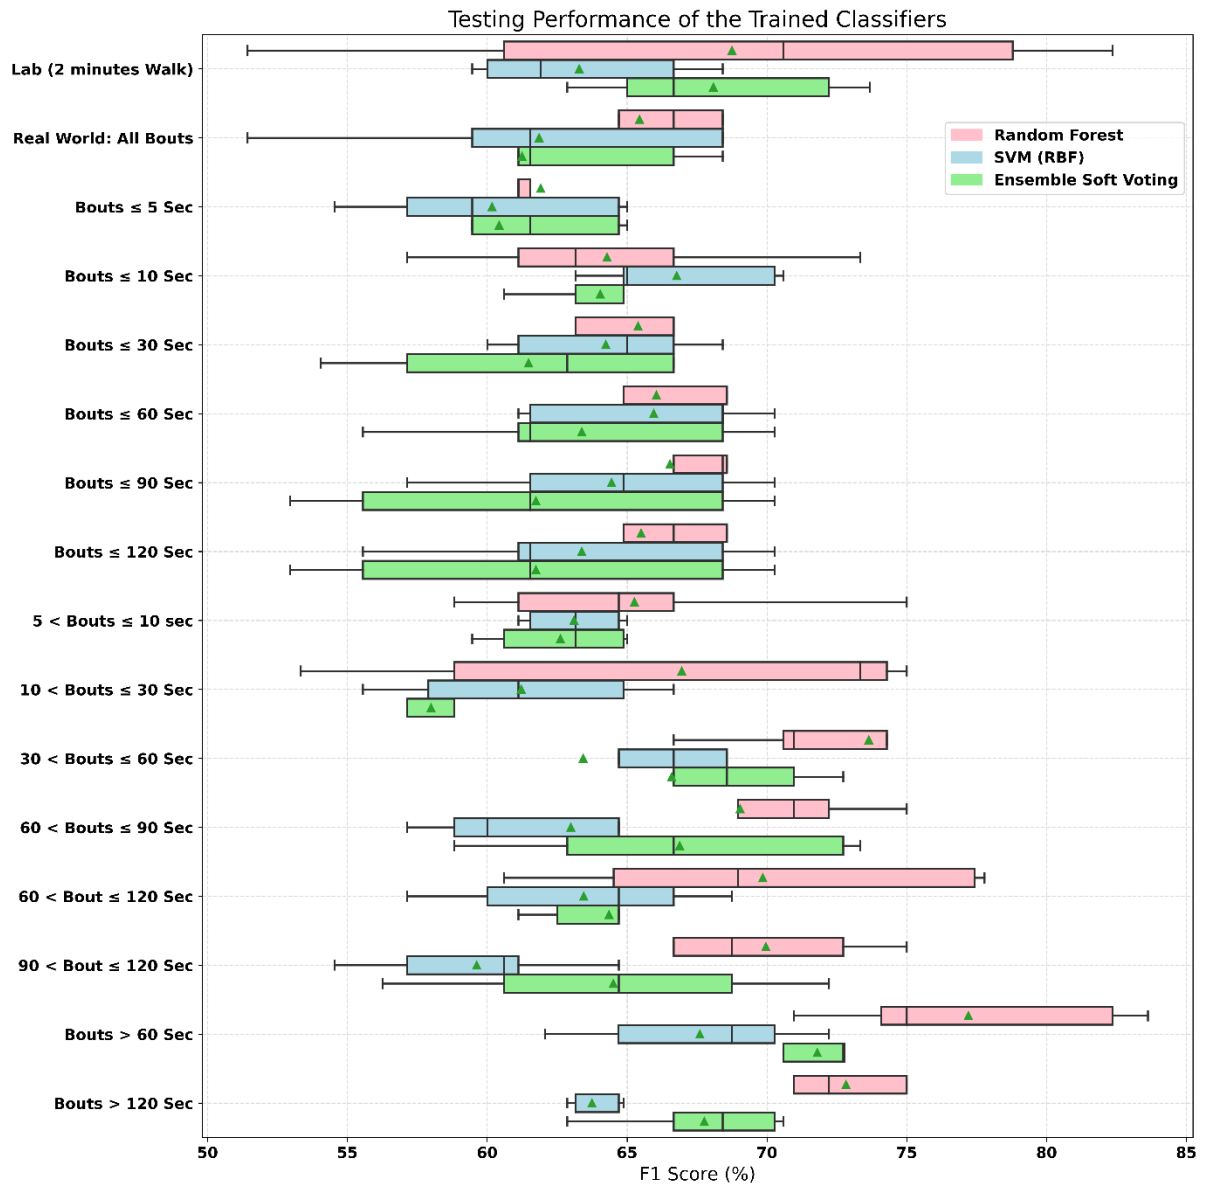

**Supplementary Figure 8.** Testing accuracy of the trained classifiers based on the lab and real-world assessment of gait under various bout lengths

**Supplementary Table 1.** Evaluation metrics of the trained classifiers on the lab and real-world test data under various bout lengths

| Lab/Bout Lengths               | Random Forest     |                    |                    | Support Vector Machine |                    |                   | Ensemble Classifier |                   |                   |
|--------------------------------|-------------------|--------------------|--------------------|------------------------|--------------------|-------------------|---------------------|-------------------|-------------------|
|                                | Accuracy          | Sensitivity        | Specificity        | Accuracy               | Sensitivity        | Specificity       | Accuracy            | Sensitivity       | Specificity       |
| <b>Lab (2 minutes)</b>         | 64.67±15.02       | 81.62±11.98        | 50.27±19.03        | 51.33±5.58             | 88.87±5.56         | 18.12±11.65       | 60.67±5.96          | 88.79±3.62        | 35.77±10.71       |
| <b>Real-world All Bouts</b>    | 60.67±10.65       | 79.55±15.94        | 43.89±12.14        | 52.67±7.23             | 82.95±17.90        | 26.71±5.33        | 53.33±7.07          | 80.02±18.85       | 30.72±7.91        |
| <b>Bouts &lt; 5 sec</b>        | 54.00±3.65        | 79.31±6.50         | 31.51±7.87         | 52.67±4.35             | 76.96±15.61        | 31.73±9.57        | 51.33±6.06          | 79.82±15.66       | 26.56±9.46        |
| <b>Bouts &lt; 10 sec</b>       | 58.67±9.60        | 78.09±9.99         | 41.99±17.87        | 58.67±6.06             | 87.94±9.20         | 32.91±11.84       | 56.00±2.79          | 83.75±12.04       | 31.72±7.58        |
| <b>Bouts &lt; 30 sec</b>       | 59.33±8.94        | 80.86±10.06        | 40.39±15.33        | 54.67±5.58             | 86.69±11.53        | 27.19±11.68       | 52.67±5.96          | 81.55±17.85       | 27.86±7.10        |
| <b>Bouts &lt; 60 sec</b>       | 60.67±10.11       | 81.07±13.74        | 42.72±13.40        | 57.33±5.48             | 88.12±11.82        | 30.72±7.91        | 54.67±6.91          | 84.20±15.65       | 29.29±7.41        |
| <b>Bouts &lt; 90 sec</b>       | 62.00±9.60        | 80.98±16.15        | 45.23±11.97        | 56.00±5.96             | 85.53±14.75        | 30.72±7.91        | 53.33±7.82          | 81.53±18.78       | 29.29±7.41        |
| <b>Bouts &lt; 120 sec</b>      | 60.67±10.90       | 79.73±16.37        | 43.89±12.14        | 54.67±6.91             | 84.20±15.65        | 29.29±7.41        | 53.33±7.82          | 81.53±18.78       | 29.29±7.41        |
| <b>5 &lt; Bouts ≤ 10 sec</b>   | 60.00±8.16        | 79.63±11.69        | 42.99±10.98        | 54.00±3.65             | 83.72±10.08        | 28.13±11.17       | 54.00±2.79          | 82.41±12.90       | 29.46±10.32       |
| <b>10 &lt; Bouts ≤ 30 sec</b>  | 64.67±10.44       | 76.59±15.01        | 54.30±10.25        | 52.67±5.96             | 79.41±9.52         | 29.04±6.68        | 52.00±6.06          | 71.30±14.78       | 35.43±1.48        |
| <b>30 &lt; Bouts ≤ 60 sec</b>  | <b>72.67±7.96</b> | <b>80.55±11.19</b> | <b>65.35±12.46</b> | 56.67±11.30            | 79.98±15.36        | 36.23±12.96       | 62.00±10.95         | 79.69±11.79       | 46.37±16.47       |
| <b>60 &lt; Bouts ≤ 90 sec</b>  | 68.67±8.37        | 73.21±9.12         | 64.08±16.53        | 58.67±7.67             | 74.89±10.38        | 44.13±8.45        | 63.33±8.50          | 77.88±7.42        | 50.42±11.52       |
| <b>60 &lt; Bouts ≤ 120 sec</b> | 68.00±8.03        | 78.97±10.76        | 58.06±8.63         | 60.00±6.24             | 73.87±10.63        | 47.88±8.92        | 60.67±5.96          | 75.22±8.75        | 47.81±9.31        |
| <b>90 &lt; Bouts ≤ 120 sec</b> | 68.67±2.98        | 81.38±9.38         | 58.80±5.20         | 54.00±4.35             | 75.64±9.89         | 36.88±7.43        | 60.67±5.96          | 79.97±12.36       | 45.27±5.48        |
| <b>Bouts &gt; 60 sec</b>       | <b>76.27±4.68</b> | <b>84.06±6.36</b>  | <b>70.78±10.45</b> | <b>64.13±2.56</b>      | <b>79.85±12.07</b> | <b>50.37±9.98</b> | <b>68.93±2.09</b>   | <b>83.51±6.46</b> | <b>56.03±6.24</b> |
| <b>Bouts &gt; 120 sec</b>      | <b>70.67±2.79</b> | <b>83.62±9.25</b>  | <b>59.90±10.51</b> | 56.00±2.79             | 82.19±7.92         | 32.99±8.49        | 62.00±3.80          | 84.87±8.15        | 41.78±8.04        |

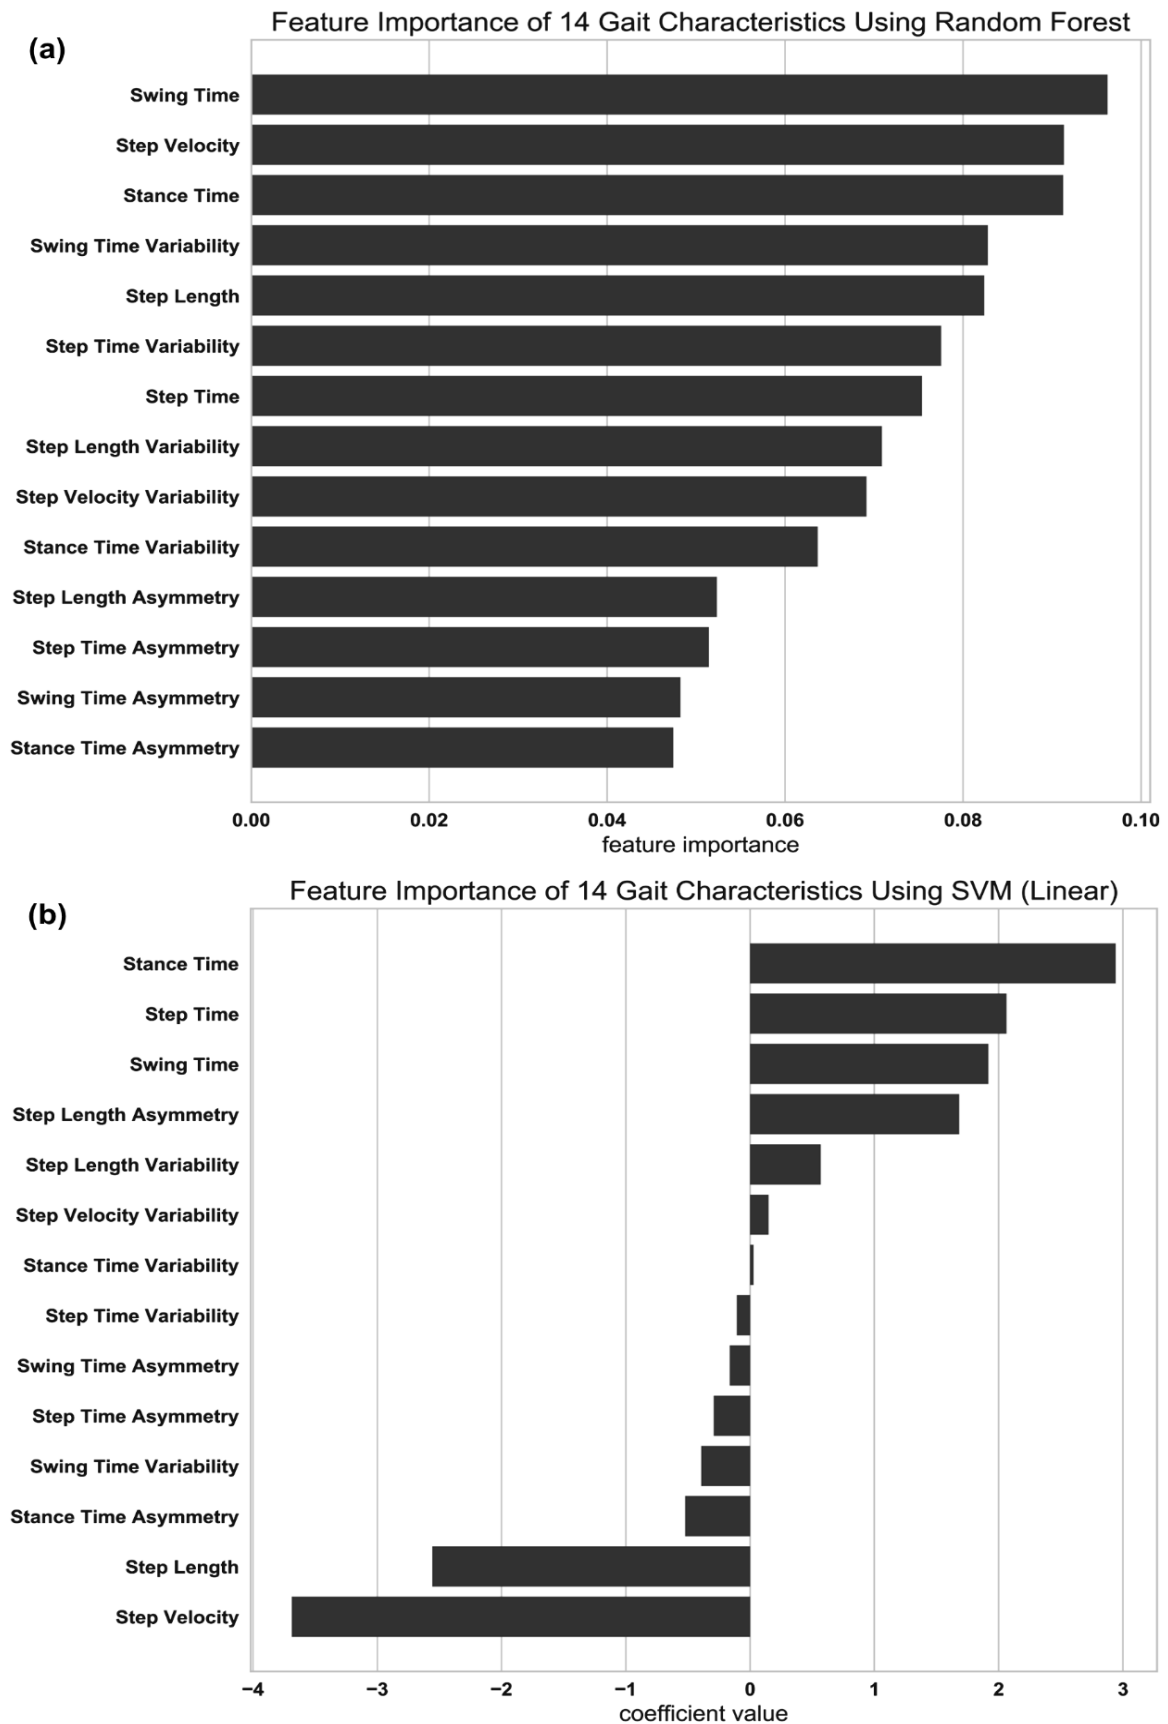

**Supplementary Figure 9.** Important characteristics identified during the classification of PD with (a) Random Forest Classifier, (b) Support Vector Machine Classifier (longer bar means more influential)
